# 1 Integrating Mendelian randomization and multiple-trait colocalization to uncover 2 cell-specific inflammatory drivers of autoimmune and atopic disease

3 Lucy M. McGowan<sup>1,\*</sup>, George Davey Smith<sup>2</sup>, Tom R. Gaunt<sup>2</sup>, Tom G. Richardson<sup>2,\*</sup>

## 4 Abstract

5 Immune mediated diseases (IMDs) arise from a lack of immune tolerance, causing chronic  
6 inflammation. Despite their growing prevalence, targeted therapies to treat IMDs are lacking.  
7 Cytokines and their receptors, which mediate inflammation, have been associated with IMD  
8 susceptibility. However, the complex signalling networks and multiple cell-types required to  
9 orchestrate inflammatory responses have made it difficult to pinpoint specific cytokines and immune  
10 cell-types which drive IMDs.

11 In this study, we developed an analytical framework which integrates Mendelian randomisation (MR)  
12 and multiple-trait colocalization (moloc) analyses to determine putative cell-specific drivers of IMDs.  
13 We used MR to determine the likelihood of causal associations between the levels of 10 circulating  
14 cytokines/cytokine receptors and 9 IMDs within human populations of European descent.  
15 Conservative (single SNP) and liberal (multiple SNP) MR analysis supported a causal role for IL-18 in  
16 inflammatory bowel disease ( $P = 1.17 \times 10^{-4}$ ) and eczema/dermatitis ( $P = 2.81 \times 10^{-3}$ ), as well as roles  
17 for IL-2 $\alpha$  and IL-6R in several IMDs.

18 Where associations between cytokines/cytokine receptors and IMDs were discovered using MR, we  
19 undertook moloc analyses. This was to assess the likelihood that cytokine/cytokine receptor protein  
20 quantitative trait loci (pQTL) and IMD-associated loci share a causal genetic variant along with  
21 expression QTL (eQTL) using data from 3 immune cell-types: monocytes, neutrophils and T cells. We  
22 found a monocyte and neutrophil-driven role for IL-18 in IBD pathogenesis, amongst evidence  
23 supporting several other cell-specific inflammatory drivers of IMDs. Our study helps to elucidate causal

---

<sup>1</sup> Department of Physiology, Pharmacology and Neuroscience, Faculty of Life Sciences, University of Bristol, BS8 1TD, UK.

<sup>2</sup> MRC Integrative Epidemiology Unit, Population Health Sciences Institute, University of Bristol, BS8 2BN, UK.

\* Correspondence: [lucy.mcgowan@bristol.ac.uk](mailto:lucy.mcgowan@bristol.ac.uk), [tom.g.richardson@bristol.ac.uk](mailto:tom.g.richardson@bristol.ac.uk)

24 pathways for the pathogenesis of IMDs which, together with other studies, highlights possible  
25 therapeutic targets for their treatment.

## 26 **Introduction**

27 Autoimmune and atopic diseases may arise due to a lack of immune tolerance towards self-antigen or  
28 harmless allergens respectively<sup>1</sup>. Loss of immune tolerance results in recurrent or chronic  
29 inflammation, causing damage to healthy tissues and extensive morbidity. The incidence of immune-  
30 mediated diseases (IMDs) has drastically increased in recent decades, highlighting the need for a  
31 clearer understanding of their pathogenesis and effective drug discovery<sup>2</sup>. Cytokines and growth  
32 factors (herein referred to as cytokines) are signalling factors which orchestrate the balance between  
33 immune homeostasis and inflammation<sup>3</sup>. However, traditional observational epidemiological studies  
34 are prone to confounding and reverse causation, making it challenging to disentangle causal effects  
35 of individual cytokines on IMDs<sup>4</sup>.

36 Genome-wide association studies (GWAS) have been instrumental in identifying large numbers of  
37 genetic loci which influence disease risk. This includes associations between loci which harbour genes  
38 responsible for the synthesis of cytokines and their receptors with autoimmune diseases such as  
39 inflammatory bowel disease (IBD)<sup>5-8</sup>, multiple sclerosis (MS)<sup>9-11</sup>, rheumatoid arthritis (RA)<sup>12</sup> and  
40 systemic lupus erythematosus (SLE)<sup>13</sup>, as well as atopic diseases such as eczema<sup>14</sup> and asthma<sup>15</sup>. This  
41 suggests that particular inflammatory cytokines may have a causal effect on the development of these  
42 diseases<sup>4</sup>. Previous studies have not yet integrated genome-wide association and cytokine loci data  
43 with cell or tissue-specific gene expression loci data to characterise the molecular basis of IMD  
44 pathogenesis. Identifying immune-cell specific disease-drivers, as well as putative causal relationships  
45 between cytokines and IMDs, will help to elucidate complex IMD pathways and identify drug target  
46 candidates for therapeutic intervention. Furthermore, targets supported by evidence from statistical  
47 analyses of human genetic data are thought to have double the success rate in clinical development<sup>16</sup>.

48 Mendelian randomization (MR) is an increasingly popular statistical method used to strengthen causal  
49 inference with respect to exposure-disease associations within human populations, in the absence of  
50 confounding variables. MR uses single nucleotide polymorphisms (SNPs), identified through GWAS, as  
51 unconfounded proxies for an exposure of interest, analogous to a randomized controlled trial<sup>17</sup>. In this  
52 study, we used a conservative (single SNP) and liberal (multiple SNPs) two-sample MR analysis to  
53 investigate associations between 10 circulating inflammatory biomarkers (cytokines or cytokine  
54 receptors<sup>18-23</sup>) (Table S1) and 9 IMDs (Table S2). We subsequently used the recently-developed  
55 multiple-trait colocalization (moloc) method<sup>24</sup>, integrating either immune cell or tissue expression  
56 quantitative expression loci (eQTL), cytokine protein QTL (pQTL) and IMD-associated loci data, to  
57 identify immune cell and tissue-specific drivers of inflammatory disease.

## 58 **Methods and Materials**

### 59 **Data Sources**

60 For our two-sample MR analysis, we harnessed genetic instrument data for 10 circulating  
61 inflammatory cytokines or soluble cytokine receptors (Table 1) from summary statistics of previously  
62 published GWAS<sup>18-20; 25</sup>. The SNP used as an instrument for *IL-6R* affected levels of soluble IL-6R. The  
63 SNPs chosen in this analysis have been shown to be robustly associated with a change in circulating  
64 levels of a cytokine ( $P < 5 \times 10^{-8}$ ) and are in *cis* with the gene of interest (i.e. the SNP was located within  
65 a 1MB distance of the gene which encoded the cytokine or cytokine receptor of interest). Data  
66 concerning IMD outcomes (Table 2) were derived from large-scale GWAS using the MR-Base  
67 platform<sup>26</sup>. For the moloc analysis, we harnessed human monocyte (CD14<sup>+</sup> CD16<sup>-</sup>), neutrophil (CD16<sup>+</sup>  
68 CD66b<sup>+</sup>) and T cell (CD4<sup>+</sup> CD45RA<sup>+</sup>) eQTL data from the BLUEPRINT epigenome project<sup>27</sup>. All data used  
69 were derived from populations of European descent.

### 70 **Mendelian Randomization**

71 Mendelian randomization follows 3 assumptions; that the selected instruments used are robustly  
72 associated with the exposure (1), that the selected instruments are unconfounded (2), and that the

73 selected instruments can only influence the outcome via the exposure (3). Using randomly-inherited  
74 unmodifiable SNPs associated with circulating inflammatory cytokine levels through GWAS as genetic  
75 instruments for MR satisfies assumptions 1 and 2. We performed two-sample MR with the MR-Base  
76 platform<sup>26</sup>, using two different analysis methods (Figure S1A) as described below, depending upon  
77 available data:

78 Conservative two-sample MR was used to analyse the causal effect of cytokines using SNPs at target  
79 genes encoding the inflammatory biomarkers of interest. As such, for this analysis we used a single  
80 SNP acting in *cis* as a genetic instrument (i.e. located within a 1MB distance of the target gene  
81 encoding the cytokine with  $P < 5 \times 10^{-08}$ ). As only one genetic instrument was used in this analysis,  
82 effect estimates were based on the Wald ratio test:

$$83 \quad \beta_{Wald\ ratio} = \frac{\hat{\beta}_{Y|Z}}{\hat{\beta}_{X|Z}}$$

$$84 \quad se(\beta_{Wald\ ratio}) = \sqrt{\frac{se(\hat{\beta}_{Y|Z})^2}{\hat{\beta}_{X|Z}^2} + \frac{\hat{\beta}_{Y|Z}^2 se(\hat{\beta}_{X|Z})^2}{\hat{\beta}_{X|Z}^4} - \frac{2\hat{\beta}_{Y|Z}cov(\hat{\beta}_{X|Z}, \hat{\beta}_{Y|Z})}{\hat{\beta}_{X|Z}^3}}$$

85 where  $\hat{\beta}_{Y|Z}$  is the coefficient of the genetic variant in the regression of the exposure (e.g. circulating  
86 cytokine level) and  $\hat{\beta}_{X|Z}$  is the coefficient of the genetic variant in the regression of the outcome.

87 Where possible, liberal MR was also used to analyse the causal effect of circulating inflammatory  
88 biomarkers on immune-mediated diseases. In contrast to the conservative MR analysis, liberal MR  
89 used multiple SNPs as genetic instruments which were either acting in *cis* or *trans* (i.e. over 1MB  
90 distance from the target gene encoding the cytokine with  $P < 5 \times 10^{-08}$ ). To identify instruments for the  
91 liberal MR we undertook genome-wide LD clumping based on  $P < 5 \times 10^{-08}$  and  $r^2 < 0.001$ . A leave-one-  
92 out MR analysis was performed in parallel with liberal MR to ensure that causal effects were not  
93 observed due to the influence of a single SNP. As two or more genetic instruments were available for  
94 liberal MR, we used the inverse variance weighted (IVW) method to obtain MR effect estimates:

$$95 \quad \beta_{IVW} = \frac{\sum_k X_k Y_k \sigma_{Yk}^{-2}}{\sum_k X_k^2 \sigma_{Yk}^{-2}}$$

96 
$$se(\beta_{IVW}) = \sqrt{\frac{1}{\sum_k X_k^2 \sigma_{Yk}^{-2}}}$$

97 Where X is the exposure, Y is the outcome and the genetic variants are k (where k = 1,...,n).

98 For both conservative and liberal MR analyses, we used the Bonferroni correction to calculate an  
99 adjusted P value threshold (conservative:  $P \leq 6.17 \times 10^{-4}$ , liberal:  $P \leq 6.94 \times 10^{-4}$ ) to account for multiple  
100 testing, where:

101 
$$Threshold = \frac{0.05}{No. Exposures \times No. Outcomes}$$

102 We subsequently undertook reverse MR analyses for all associations which survived multiple testing  
103 to investigate reverse causation (i.e. the likelihood that genetic predisposition to disease has an  
104 influence on inflammatory cytokine levels). As an additional sensitivity analysis, we used the MR  
105 Steiger directionality test to assess the directionality of associations between inflammatory cytokines  
106 and complex traits<sup>28</sup>.

### 107 **Multiple Trait Colocalization Analysis**

108 We applied the moloc approach<sup>24</sup> to immune cell-specific expression quantitative trait loci (eQTL)  
109 data, inflammatory biomarker protein QTL (pQTL) data, and IMD-associated loci data, to identify  
110 putative immune cell-specific drivers of IMDs (Figure S1B). The moloc method uses a Bayesian  
111 statistical framework to calculate PPA (posterior probability of association) scores to measure the  
112 degree of colocalization between gene loci using 3 or more datasets. PPA scores of  $\geq 80\%$  are likely to  
113 share a common genetic causal variant based on evaluations undertaken by the authors<sup>24</sup>. We  
114 obtained eQTL data derived from concerning neutrophils (CD16<sup>+</sup> CD66b<sup>+</sup>), monocytes (CD14<sup>+</sup> CD16<sup>-</sup>),  
115 and T cells (CD4<sup>+</sup> CD45RA<sup>+</sup>)<sup>27</sup>. We ran independent analyses for each of the 3 immune cell-types,  
116 testing the degree of colocalization between immune cell eQTL, with inflammatory biomarker pQTL  
117 and IMD-associated loci.

118 We chose to perform moloc for inflammatory biomarkers and IMDs in this instance based upon a P-  
119 value threshold  $< 0.05$  in either the conservative or liberal MR analysis. Along with investigating cell-  
120 type specificity for identified associations, this analysis was used to detect evidence of a coordinated  
121 system which is consistent with causality (i.e. gene expression and respective protein products  
122 colocalize with the associated complex traits). As such these findings can complement evidence from  
123 MR to detect putative causal effects between biomarkers and disease.

124 Finally, we undertook moloc analyses to investigate gene expression within different tissue types using  
125 data from the GTEx consortium v6p<sup>29</sup>. Our 3 traits in each analysis were the circulating inflammatory  
126 cytokine using pQTL data, the complex trait with strongest evidence of association with the cytokine  
127 in either the liberal or conservative MR analyses, and tissue-specific gene expression for the cytokine  
128 using GTEx eQTL data. We only investigated tissue-types with at least one eQTL ( $P < 1.0 \times 10^{-04}$ ) for the  
129 target cytokine gene. As in the immune-cell eQTL moloc analysis, evidence of colocalization was based  
130 on a PPA score of  $\geq 80\%$ .

131 All statistical and bioinformatics analyses were undertaken using R statistical software version 3.31<sup>30</sup>.  
132 Plots illustrating multiple trait colocalization were generated using base R graphics, whereas our  
133 volcano plot was generated using ggplot<sup>31</sup>.

## 134 **Results**

### 135 **Mendelian Randomization Analyses Identify Putative Causal Relationships Between Circulating** 136 **Cytokine/Cytokine Receptor Levels and IMDs**

137 We first used a conservative MR approach to detect associations between inflammatory biomarkers  
138 and IMDs, using a single cis-acting SNP instrument for the inflammatory biomarker gene of interest.  
139 *IP-10* and *TRAIL* were removed from the analysis as the SNP identified as instruments<sup>18</sup> had minor  
140 allele frequencies too rare ( $< 0.05$ ) to undertake formal two-sample MR. Results from the conservative  
141 MR analysis are displayed in Figure 1 and Table S3. Based on a Bonferroni corrected P-value threshold

142 of  $P \leq 6.17 \times 10^{-4}$ , we identified associations between soluble IL-6R levels and eczema/dermatitis ( $P =$   
143  $1.35 \times 10^{-8}$ ), rheumatoid arthritis (RA) ( $P = 5.67 \times 10^{-8}$ ), Crohn's disease (CD) ( $P = 2.81 \times 10^{-5}$ ) and Asthma  
144 ( $P = 1.12 \times 10^{-4}$ ), as well as an association between IL-2R $\alpha$  levels and multiple sclerosis (MS) ( $P = 1.75$   
145  $\times 10^{-5}$ ).

146 We next performed a liberal MR analysis using all available instruments (i.e. acting in either *cis* or  
147 *trans*), associated with our inflammatory biomarkers (Exposure, Table S1) as instruments. *IL-6R* (SNPs  
148 affecting levels of soluble IL-6R only), *MIF*, and *IL-2R $\alpha$*  were excluded from the liberal analysis as there  
149 was only one remaining SNP available for MR after LD clumping to remove SNPs in linkage  
150 disequilibrium with one another. We adjusted our Bonferroni corrected P value threshold to account  
151 for the change in the number of tests and applied the new threshold of  $P \leq 6.14 \times 10^{-4}$  to the liberal  
152 MR results. From this analysis we found evidence to suggest there may be causal relationships  
153 between circulating levels of IL-18 and inflammatory bowel disease (IBD) ( $P = 1.17 \times 10^{-4}$ ) and  
154 eczema/dermatitis ( $P = 2.81 \times 10^{-3}$ ). These associations were not detected in the conservative analysis  
155 using the *IL-18* SNP (rs71478720) alone ( $P = 1.06 \times 10^{-2}$ , E/D:  $P = 2.81 \times 10^{-3}$ ), although using multiple  
156 instruments in the liberal MR provided much stronger evidence of association.

157 One of the advantages of the liberal MR analysis is that sensitivity analyses can be performed to test  
158 the robustness and the direction of putative inferred causal relationships. Thus, we next conducted a  
159 leave one out analysis to ensure that no single SNP from the instruments was responsible for the  
160 observed effect. Both the analyses of *IL-18* on IBD (Figure 2) and on eczema/dermatitis (Figure S2)  
161 survived leave-one-out analyses (Table S5), as the removal of any individual SNP from the analysis had  
162 little effect on observed effect estimates. These results provide evidence to support a causal role for  
163 circulating IL-18 levels in the pathogenesis of IBD and eczema/dermatitis. Moreover, reverse MR  
164 (Table S6) and the Steiger directionality test<sup>28</sup> (Table S7) showed that reverse causation was unlikely  
165 for any of the associations identified in either the conservative or liberal MR analysis.

166

## 167 **Multiple-trait Colocalization Uncovers Immune Cell-Specific Drivers of IMD**

168 We next investigated the cell-type specificity for the detected putative drivers of IMD using eQTL data  
169 from the BLUEPRINT consortium<sup>27</sup>. For circulating inflammatory biomarkers and IMDs where evidence  
170 of a causal association was detected using MR, we applied the moloc method using eQTL data for the  
171 gene encoding the target inflammatory biomarker, pQTL data for the circulating inflammatory  
172 biomarker itself and GWAS summary statistics for the associated complex trait (Figure S1B). We tested  
173 whether immune-cell eQTL (a) colocalised with pQTL (b) and IMD-associated loci (c) The moloc analysis  
174 was performed 3 times for each association, using eQTL from either human CD14<sup>+</sup> CD16<sup>-</sup> monocytes  
175 (a<sub>1</sub>), CD16<sup>+</sup> CD66b<sup>+</sup> neutrophils (a<sub>2</sub>) or CD4<sup>+</sup> CD45RA<sup>+</sup> T cells (a<sub>3</sub>).

176 We found evidence of multiple-trait colocalization between 10 combinations of immune-cell eQTL,  
177 IMD-associated loci, and inflammatory biomarker pQTL (Table S8). PPA scores measuring  
178 colocalization of genetic signals between all 3 traits (PPA<sub>abc</sub>) indicated that monocytes (PPA<sub>a1bc</sub> =  
179 0.8812) and neutrophils (PPA<sub>a2bc</sub> = 0.9657), but not T cells (PPA<sub>a3bc</sub> = 0.0159), may drive IBD via IL-18  
180 (Figure 3A). Additionally, we found evidence of a T cell-specific role in the disease pathways of  
181 eczema/dermatitis (PPA<sub>a3bc</sub> = 0.9115) driven by soluble IL-6R (Figure 3B). IL-2R $\alpha$  pQTL, MS-associated  
182 loci and T cell eQTL showed evidence of colocalization (PPA<sub>a3bc</sub> = 0.8826), but there were no *IL-2R $\alpha$*   
183 eQTL data within monocytes or neutrophils in the BLUEPRINT study.

184 In the tissue-specific analysis, the association between IL18 and IBD was relatively ubiquitous, as  
185 evidence of colocalization was observed within 7 diverse tissue types (Table S9), including thyroid  
186 tissue (Figure 4a). Evidence of colocalization for the association between soluble IL6R and  
187 eczema/dermatitis was observed in 3 tissue types, most strongly in whole blood (PPA = 99.5%), which  
188 may help shed light on the pleiotropic effects observed at this locus (Figure 4b). Lastly, the association  
189 between *IL2ra* and multiple sclerosis colocalized in only two tissues; subcutaneous adipose and spleen  
190 (Figure 4c).

191



## 192 Discussion

193 The prevalence of autoimmune and atopic diseases has increased drastically over recent decades,  
194 particularly within European populations<sup>2; 32</sup>. Despite the rising demand, a poor understanding of the  
195 molecular pathways driving IMDs means that drugs for their treatment are lacking<sup>33; 34</sup>. Cytokines and  
196 their receptors mediate the balance between tolerance and inflammation, by signalling between  
197 immune cells, making them attractive therapeutic targets<sup>35</sup>. However, the ways in which the hundreds  
198 of functionally diverse cytokines interact and orchestrate inflammatory responses in the body are  
199 unclear<sup>36</sup>. Consequently, identifying individual cytokines for drug-targeting which drive IMDs has been  
200 difficult. The use of two-sample MR has aided the elucidation of many disease pathways, by measuring  
201 the likelihood of causal relationships between exposures and traits in human populations<sup>37</sup>. In this  
202 study, we developed a framework that integrates MR with multiple-trait colocalization to gain insights  
203 into the molecular basis of IMD pathogenesis. Using this framework, we found evidence to support  
204 causal relationships between levels of: circulating IL-18 and IBD, as well as eczema/dermatitis,  
205 circulating soluble IL-6R and eczema/dermatitis, and circulating IL-2R $\alpha$  and MS, amongst others  
206 (Tables S3-4, S6-8). Additionally, we provided evidence to suggest that these associations are likely to  
207 be driven in an immune-cell and tissue-specific manner. We believe our analysis framework could be  
208 applied by other studies with alternative hypotheses, as a way of disentangling complex biochemical  
209 cell signalling pathways and identifying molecules and cell-types which are likely to drive disease.

210 A T cell-mediated role for IL-2/IL-2R $\alpha$  in MS has already been well established through epidemiological  
211 and lab-based studies<sup>10; 38</sup>. The IL-2R-targeting drug daclizumab was given FDA approval for the  
212 treatment of MS, but was recently withdrawn due to serious side-effects<sup>39-41</sup>. Additionally, a causal  
213 role for IL-18R in atopic dermatitis has recently been described, by integrating MR and pQTL-data<sup>42</sup>.  
214 Our results provide additional evidence to support these existing findings, as well as identifying  
215 monocytes and neutrophils as potential drivers of the relationship between IL-18 and  
216 eczema/dermatitis (Table S8). However, the associations between soluble IL-6R variation and

217 eczema/dermatitis, or IL-18 and IBD within human populations are less well understood. Our analyses  
218 not only help establish evidence for causal relationships between these inflammatory biomarkers and  
219 IMDs, but also help characterize their cell-type specific nature.

220 IL-18, a member of the IL-1 superfamily of cytokines, is a potent inducer of Th1 mediated inflammation  
221 and INF- $\gamma$  production<sup>43</sup>. This cytokine was first linked to IBD nearly 20 years ago, where it was shown  
222 to be highly expressed in intestinal tissues derived from IBD patients, compared to healthy control  
223 patients<sup>44</sup>. Using murine IBD models, deletion of *il-18* or its receptor *il-18r1* has been shown to be  
224 protective against inducible-colitis, by controlling goblet cell function and maintaining intestinal  
225 barrier homeostasis<sup>45</sup>. Despite strong evidence to suggest a role for IL-18 in IBD in mice, whether there  
226 was a causative role within human populations remained unclear. Our study provides evidence that  
227 *IL-18* is likely the causal gene responsible for the association with IBD at this locus, as well as our MR  
228 analysis supporting a causal role for IL-18 in the disease pathogenesis of IBD within human  
229 populations. Furthermore, the moloc analyses suggested that innate immune cells such as monocytes  
230 and neutrophils are likely to drive this association, supporting the current dogma that innate  
231 production of IL-18 stimulates Th1/Th17-mediated autoimmunity in IBD<sup>47</sup>. The T cell-specific eQTL  
232 data currently available for moloc analyses concerned naive CD4<sup>+</sup> T cells<sup>27</sup>. More eQTL data concerning  
233 activated and differentiated immune cell subsets, such as macrophages, dendritic cells and T helper  
234 cell subsets (i.e. Th1, Th2, Th17, Treg) are required for additional immune cell subset-specific moloc  
235 analysis, to further elucidate the molecular pathways which drive IMDs. However, this data may be  
236 difficult to acquire on a large-scale. Although eQTL data for many tissue types are now readily  
237 available<sup>29</sup>, moloc analysis using tissue-specific eQTL data concerning tissues which are known to  
238 become inflamed during IMDs would help to indicate whether cytokine or cytokine receptor  
239 expression in certain tissue types drives IMDs. For example, eQTL data from the different layers within  
240 the intestine would help to further unravel which roles inflammatory biomarkers are likely play in  
241 driving inflammation during IBD, in a tissue-context-dependent manner.

242 IL-6R is the receptor of the pro-inflammatory cytokine IL-6, which can exist in a membrane-bound  
243 state (classical) to the surface of leukocytes and hepatocytes, or in soluble form (trans)<sup>48</sup>. Both,  
244 classical and trans IL-6R signalling culminates in the expression of signal transducer and activator of  
245 transcription (STAT)3, which promotes inflammation via the expression of genes encoding  
246 antiapoptotic proteins and cytokines<sup>49</sup>. However, classical IL-6 signalling can act on few cell types  
247 compared to trans IL-6 signalling, which can act on any cell which has the cell-bound signal transducer,  
248 gp130<sup>50</sup>. One GWAS previously reported the an association between elevated soluble IL-6R levels  
249 resulting from a SNP in *IL-6R* and atopic dermatitis<sup>51</sup>. We provide evidence from the conservative MR  
250 and moloc analyses that supports a causal role between soluble IL-6R and eczema/dermatitis. Levels  
251 of membrane-bound IL-6R (leading to classical IL-6 signalling) and soluble IL-6R (trans IL-6 signalling)  
252 fluctuate as a result of receptor shedding by cells expressing membrane-bound IL-6R, as wells changes  
253 to the amount of receptor being synthesised by cells<sup>50</sup>. Moreover, the ratio of classical to trans IL-6  
254 signalling also depends upon levels of IL-6 and cell-bound gp130. Therefore, analyses combining  
255 instruments which affect the classical or trans signalling pathways would provide a clearer insight into  
256 the role of IL-6 signalling in disease. Interestingly, activated CD4<sup>+</sup> T cells have been shown increase  
257 levels of soluble IL-6R, by shedding their membrane-bound IL-6R; this mechanism is thought to have  
258 a role in the development of autoimmune diseases, which are often mediated by autoreactive T cells  
259 <sup>52; 53</sup>. Through the moloc analysis, we showed that eczema/dermatitis was likely to be driven by IL-6R  
260 expression in T cells (Figure 3B, Table S8), a finding which is supported by evidence of increased IL-6R  
261 shedding leading to an increase in soluble IL-6R in people diagnosed with atopic dermatitis compared  
262 to healthy controls<sup>51</sup>.

263 Relatively few SNPs have been associated with changes in the circulating inflammatory biomarkers  
264 investigated in this study, as most of the GWAS summary statistics used to identify our instruments  
265 were derived from cohorts with fewer than 9000 people<sup>18-20</sup>; this is likely due to the high cost of  
266 quantification of circulating cytokines and cytokine receptors from blood. Our reverse MR analysis  
267 may therefore have been underpowered to evaluate evidence of reverse causation, although

268 supplementing this analysis using the Steiger directionality test also suggested that this was unlikely  
269 for the associations we identified. As sample sizes for GWAS of circulating cytokines increase, the  
270 analysis pipeline illustrated by this study will have further power to detect novel relationships between  
271 markers of inflammation and complex disease.

272 In conclusion, in this study we have found strong evidence supporting new and known causal,  
273 immune-cell driven relationships between inflammatory biomarkers and IMDs. Triangulation of  
274 results from these analyses, with published results from experimental models of IMDs and GWAS,  
275 suggests that targeting IL-18 or its receptor, IL-18R, may be promising for the treatment of IBD. Indeed,  
276 small molecule inhibitors which target and repress IL-18-mediated signalling events are currently  
277 under development, although not for the treatment of IBD<sup>54</sup>. Moreover, a recently-published phase-  
278 II trial of an IL-18 binding protein (IL-18bp) drug to treat adult-onset Still's disease demonstrated a  
279 favourable efficacy safety profile. If further trials are deemed successful, IL-18bp drugs may also be  
280 used to target other IMDs such as IBD.

## 281 **Appendices**

282 No appendices.

## 283 **Supplemental Data Declaration**

284 **Document S1.** Supplementary figures S1 & S2 (PDF).

285 **Data S1.** Supplementary tables S1-S8 (.xls).

## 286 **Acknowledgements**

287 This study and L.M.M were financially supported by a 4-year studentship fund from the Wellcome  
288 Trust Dynamic Molecular Cell Biology Ph.D. Programme at the University of Bristol: (108907/Z/15/Z).  
289 T.G.R is a UKRI Innovation Research Fellow (MR/S003886/1). The research was carried out in the UK  
290 Medical Research Council Integrative Epidemiology Unit (MC\_UU\_00011/4 and MC\_UU\_00011/1).

291 This study makes use of data generated by the BLUEPRINT Consortium<sup>27</sup> and data generated by the  
292 GTEx Consortium<sup>29</sup>.

### 293 **Declaration of Interests**

294 T.R.G. receives research funding from GlaxoSmithKline, Biogen and Sanofi.

### 295 **Web Resources**

296 MR-Base Platform: <http://www.mrbase.org/>

297 Blueprint: <http://dcc.blueprint-epigenome.eu/#/home>

298 GTEx: <https://www.gtexportal.org/home/>

299

300

301

302

303

304

305

306

307

308

309

310 **Figures**

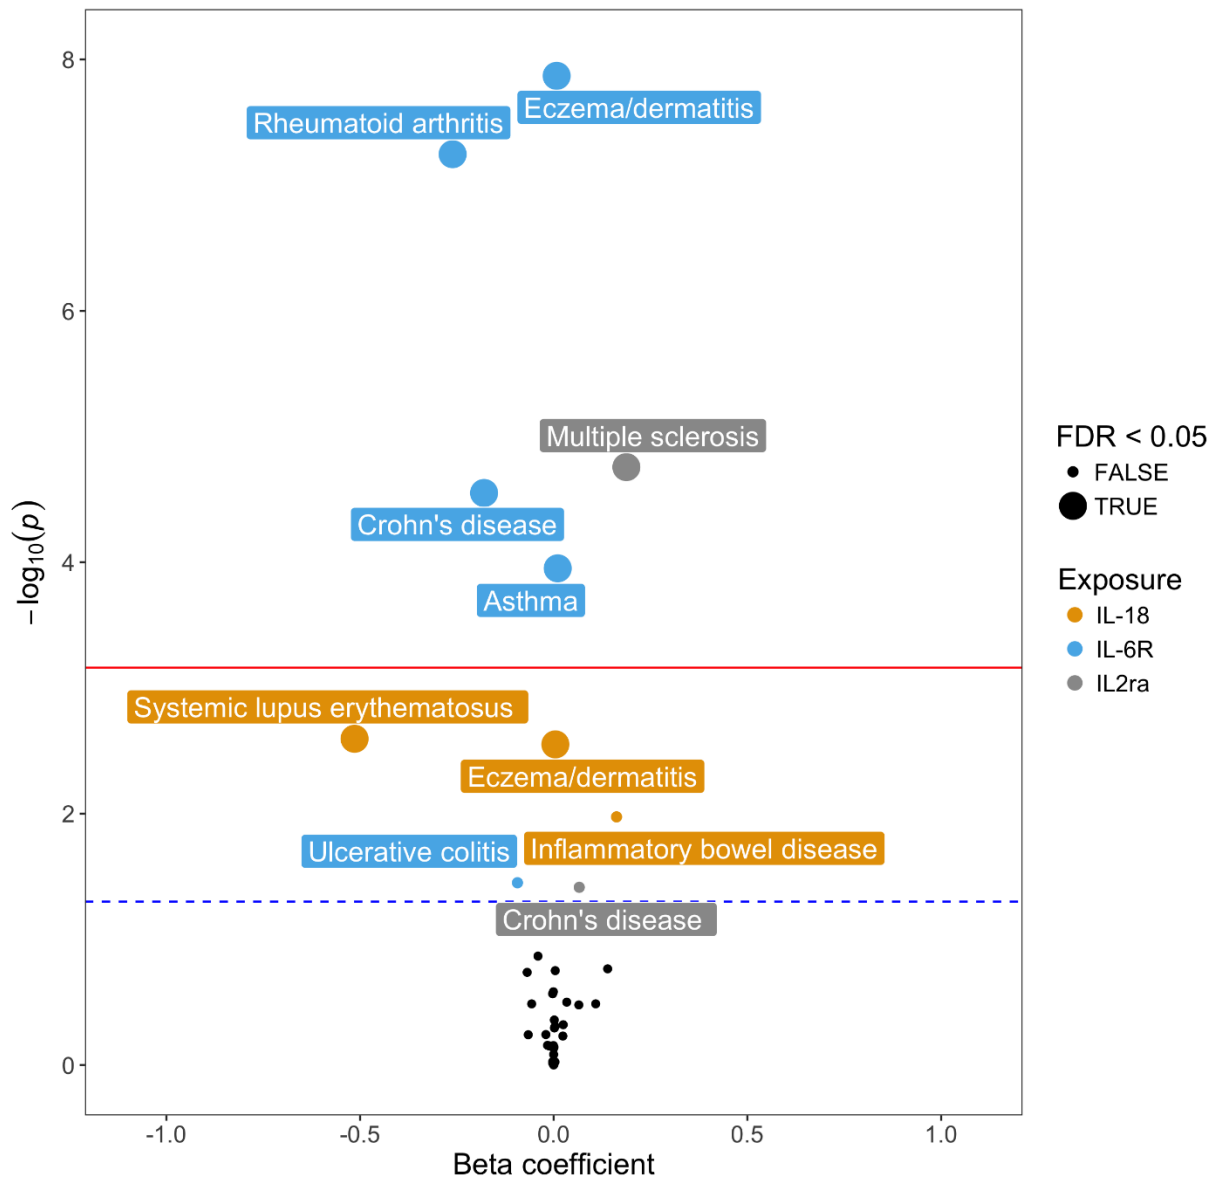

311

312 **Figure 1. Conservative Mendelian randomization (MR) analysis detects associations between**  
313 **circulating inflammatory biomarkers and IMDs.** Volcano plot of conservative MR analysis illustrating  
314 associations between inflammatory cytokines and complex traits. Red (upper) line represents  
315 Bonferroni corrected threshold ( $P \leq 6.17 \times 10^{-4}$ ) and black dotted line (bottom) represents unadjusted  
316 threshold ( $P \leq 0.05$ ).

317

318

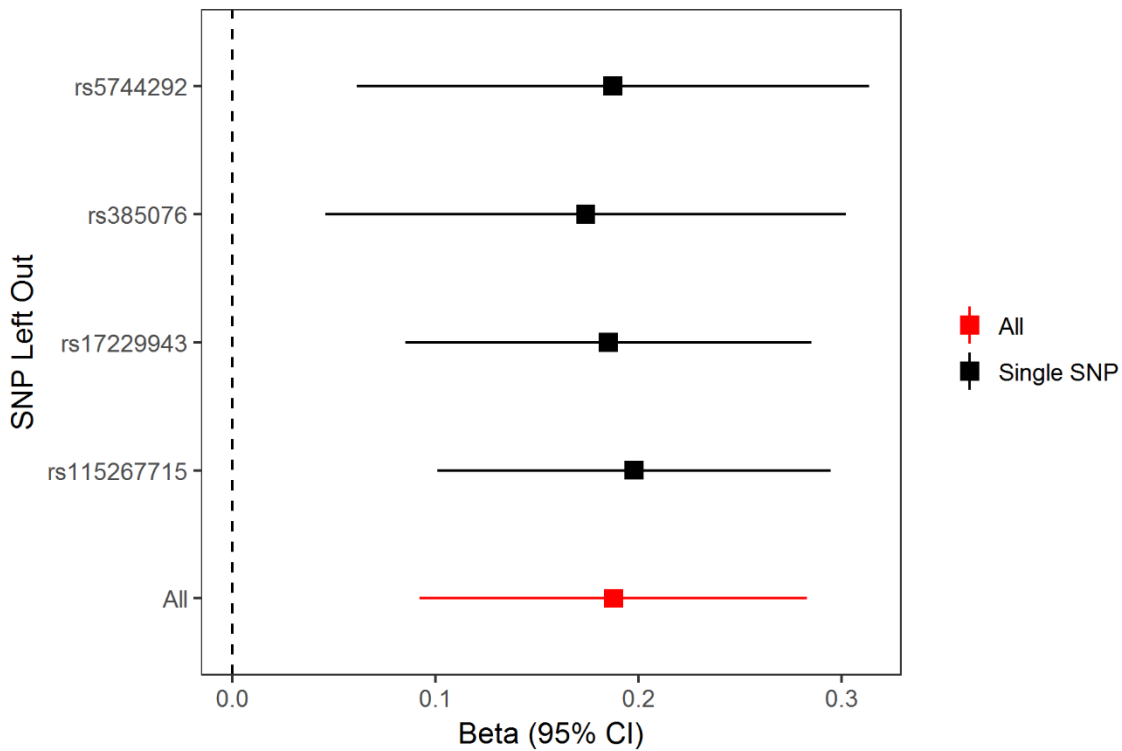

319

320 **Figure 2. Liberal Mendelian randomization (MR) identifies a putative causal relationship between**  
321 **circulating levels of IL-18 and IBD which survives leave-one out sensitivity analysis.** Leave-one out  
322 MR analysis for SNPs used as instruments for liberal MR analysis (black). Results show that this effect  
323 is not likely to be due to an individual SNP when compared to the observed effect of all SNPs (red).

324

325

326

327

328

329

330

331

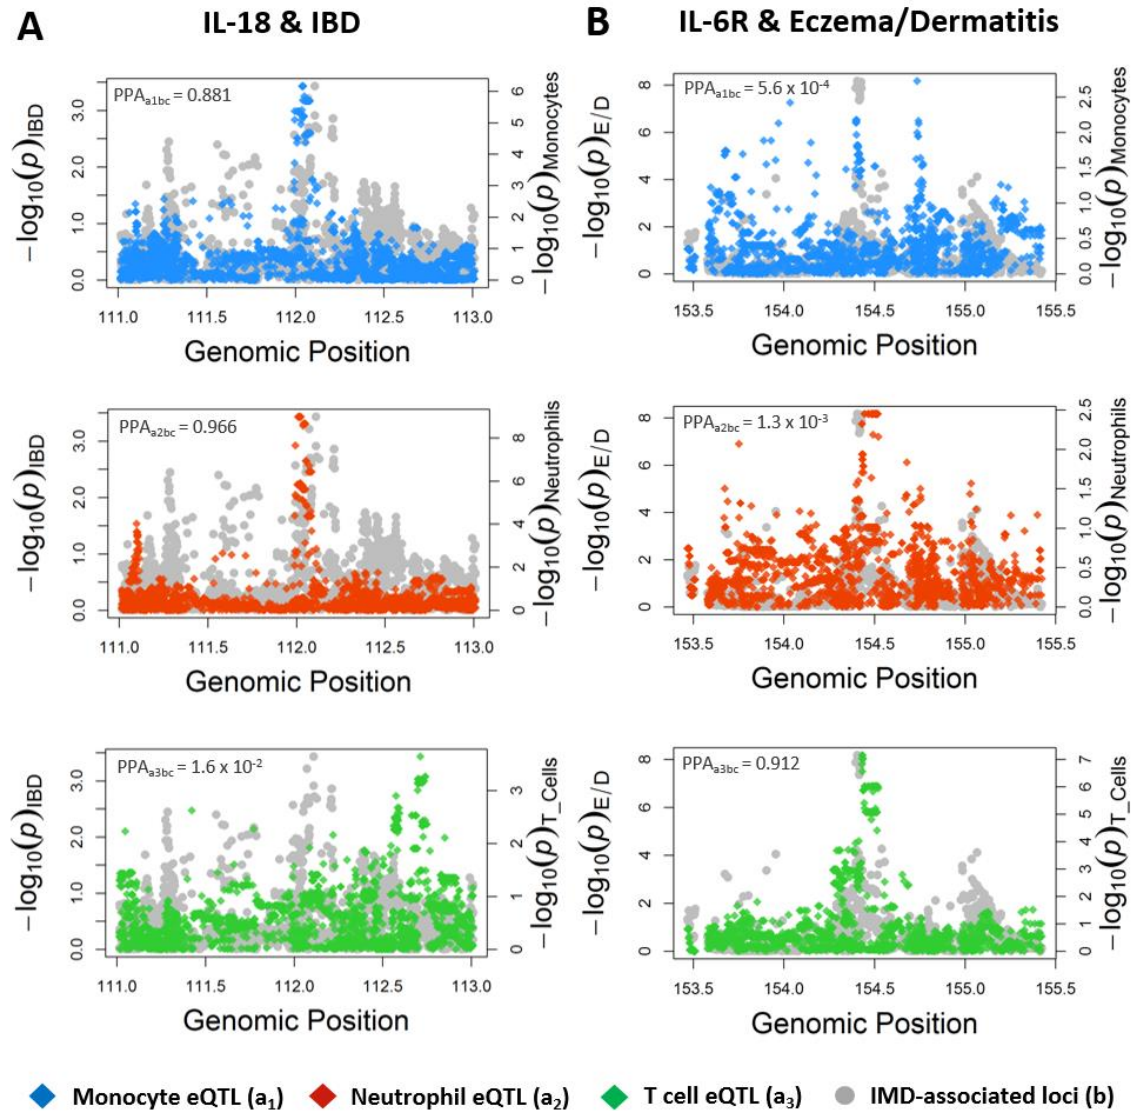

332

333

334

335

336

337

338

339

340

341

**Figure 3. Multiple-trait colocalization reveals immune cell-specific divers of IMDs using immune cell expression quantitative trait loci (eQTL) data, inflammatory cytokine or cytokine receptor protein QTL (pQTL) data and immune-mediated disease GWAS data.** These plots illustrate observed effects of genetic variants at the *IL-18* (A) and *IL-6R* (B) loci on inflammatory bowel disease (IBD) and eczema/dermatitis (E/D) respectively. Effect estimates on the expression of IL-18 and IL6R are overlaid in each plot using eQTL data derived from monocytes (top,  $a_1$ ), neutrophils (middle,  $a_2$ ) and T cells (bottom,  $a_3$ ). For simplicity, circulating cytokine effects are not displayed within the plots but were used to calculate  $PPA_{abx}$  scores.  $PPA_{abc}$  values reflect the likelihood that a causal variant influences the target cytokine ( $b$ ), associated complex trait ( $c$ ) and the expression of the corresponding gene ( $a$ ).  $PPA_{abc}$



342  $\geq 0.8$  indicates evidence of colocalization (i.e. a shared genetic variant between all 3 signals) and  
343 suggests that the cytokine (or its receptor) is a putative driver of the IMD when it is expressed within  
344 the cell-type of interest.

345

346

347

348

349

350

351

352

353

354

355

356

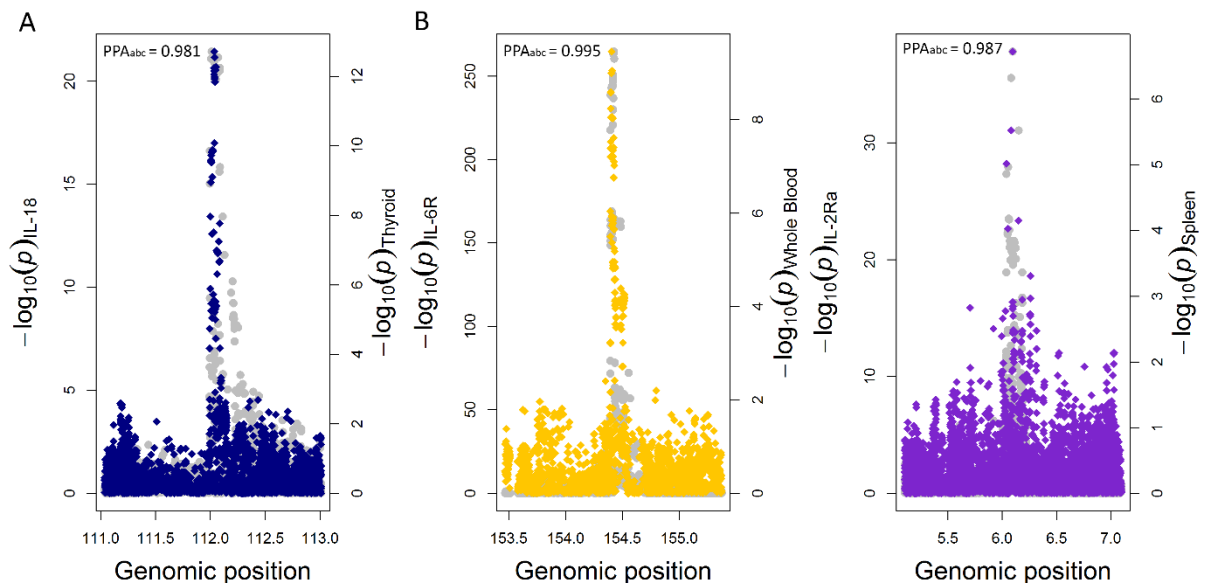

357

358

359

360

361

362

363

364

365

366

367

368

369

370

371

372

**Figure 4. Multiple-trait colocalization indicates tissue specific expression of genes which are associated with circulating cytokine or cytokine receptor levels and immune-mediated disease (IMD) susceptibility.** These plots illustrate observed effects of genetic variants at the *IL-18* (A), and *IL-6R* (B) and *IL-2Rα* (C) loci with their corresponding protein product. Effect estimates on the expression of *IL-18*, *IL-6R*, *IL-2Rα* are overlaid in each plot using expression quantitative trait loci data derived from thyroid (A), whole blood (B) and spleen (C). For simplicity, effects on complex traits are not displayed within the plots but were used to calculate PPA<sub>abc</sub> scores. PPA<sub>abc</sub> values reflect the likelihood that a causal variant influences the target cytokine (b), associated complex trait (c) and the expression of the corresponding gene (a). PPA<sub>abc</sub> ≥ 0.8 indicates evidence of colocalization (i.e. a shared genetic variant between all 3 signals) and suggests that the cytokine (or its receptor) is a putative driver of the IMD when it is expressed within the tissue-type of interest.

## 373 References

- 374 1. Rabin, R.L., and Levinson, A.I. (2008). The nexus between atopic disease and autoimmunity: a review  
375 of the epidemiological and mechanistic literature. *Clinical and Experimental Immunology* 153,  
376 19-30.
- 377 2. Bach, J.F. (2018). The hygiene hypothesis in autoimmunity: the role of pathogens and commensals.  
378 *Nature Reviews Immunology* 18, 105-+.
- 379 3. Hirahara, K., Schwartz, D., Gadina, M., Kanno, Y., and O'Shea, J.J. (2016). Targeting cytokine signaling  
380 in autoimmunity: back to the future and beyond. *Current Opinion in Immunology* 43, 89-97.
- 381 4. Smith, G.D., and Ebrahim, S. (2003). 'Mendelian randomization': can genetic epidemiology  
382 contribute to understanding environmental determinants of disease? *International Journal of*  
383 *Epidemiology* 32, 1-22.
- 384 5. Duerr, R.H., Taylor, K.D., Brant, S.R., Rioux, J.D., Silverberg, M.S., Daly, M.J., Steinhart, A.H.,  
385 Abraham, C., Regueiro, M., Griffiths, A., et al. (2006). A genome-wide association study  
386 identifies IL23R as an inflammatory bowel disease gene. *Science* 314, 1461-1463.
- 387 6. Franke, A., Balschun, T., Karlsen, T.H., Sventoraityte, J., Nikolaus, S., Mayr, G., Domingues, F.S.,  
388 Albrecht, M., Nothnagel, M., Ellinghaus, D., et al. (2008). Sequence variants in IL10, ARPC2 and  
389 multiple other loci contribute to ulcerative colitis susceptibility. *Nature Genetics* 40, 1319-  
390 1323.
- 391 7. Festen, E.A.M., Goyette, P., Green, T., Boucher, G., Beauchamp, C., Trynka, G., Dubois, P.C., Lagace,  
392 C., Stokkers, P.C.F., Hommes, D.W., et al. (2011). A Meta-Analysis of Genome-Wide  
393 Association Scans Identifies IL18RAP, PTPN2, TAGAP, and PUS10 As Shared Risk Loci for  
394 Crohn's Disease and Celiac Disease. *Plos Genetics* 7.
- 395 8. Liu, J.Z., van Sommeren, S., Huang, H.L., Ng, S.C., Alberts, R., Takahashi, A., Ripke, S., Lee, J.C., Jostins,  
396 L., Shah, T., et al. (2015). Association analyses identify 38 susceptibility loci for inflammatory  
397 bowel disease and highlight shared genetic risk across populations. *Nature Genetics* 47, 979-  
398 +.
- 399 9. Beecham, A.H., Patsopoulos, N.A., Xifara, D.K., Davis, M.F., Kempainen, A., Cotsapas, C., Shah, T.S.,  
400 Spencer, C., Booth, D., Goris, A., et al. (2013). Analysis of immune-related loci identifies 48  
401 new susceptibility variants for multiple sclerosis. *Nature Genetics* 45, 1353-+.
- 402 10. Sawcer, S., Hellenthal, G., Pirinen, M., Spencer, C.C.A., Patsopoulos, N.A., Moutsianas, L., Dilthey,  
403 A., Su, Z., Freeman, C., Hunt, S.E., et al. (2011). Genetic risk and a primary role for cell-  
404 mediated immune mechanisms in multiple sclerosis. *Nature* 476, 214-219.
- 405 11. Briggs, F.B.S., Shao, X.R., Goldstein, B.A., Oksenberg, J.R., Barcellos, L.F., De Jager, P.L., and Int  
406 Multiple Sclerosis, G. (2011). Genome-wide association study of severity in multiple sclerosis.  
407 *Genes and Immunity* 12, 615-625.
- 408 12. Stahl, E.A., Raychaudhuri, S., Remmers, E.F., Xie, G., Eyre, S., Thomson, B.P., Li, Y.H., Kurreeman,  
409 F.A.S., Zhernakova, A., Hinks, A., et al. (2010). Genome-wide association study meta-analysis  
410 identifies seven new rheumatoid arthritis risk loci. *Nature Genetics* 42, 508-U556.
- 411 13. Bentham, J., Morris, D.L., Graham, D.S.C., Pinder, C.L., Tomblason, P., Behrens, T.W., Martin, J.,  
412 Fairfax, B.P., Knight, J.C., Chen, L.Y., et al. (2015). Genetic association analyses implicate  
413 aberrant regulation of innate and adaptive immunity genes in the pathogenesis of systemic  
414 lupus erythematosus. *Nature Genetics* 47, 1457-+.
- 415 14. Paternoster, L., Standl, M., Waage, J., Baurecht, H., Hotze, M., Strachan, D.P., Curtin, J.A.,  
416 Bonnelykke, K., Tian, C., Takahashi, A., et al. (2015). Multi-ancestry genome-wide association  
417 study of 21,000 cases and 95,000 controls identifies new risk loci for atopic dermatitis. *Nature*  
418 *Genetics* 47, 1449-+.
- 419 15. Demenais, F., Margaritte-Jeannin, P., Barnes, K.C., Cookson, W.O.C., Altmuller, J., Ang, W., Barr,  
420 R.G., Beaty, T.H., Becker, A.B., Beilby, J., et al. (2018). Multi-ancestry association study  
421 identifies new asthma risk loci that colocalize with immune-cell enhancer marks. *Nature*  
422 *Genetics* 50, 42-+.

- 423 16. Nelson, M.R., Tipney, H., Painter, J.L., Shen, J.D., Nicoletti, P., Shen, Y.F., Floratos, A., Sham, P.C.,  
424 Li, M.J., Wang, J.W., et al. (2015). The support of human genetic evidence for approved drug  
425 indications. *Nature Genetics* 47, 856-+.
- 426 17. Davey Smith, G., and Hemani, G. (2014). Mendelian randomization: genetic anchors for causal  
427 inference in epidemiological studies. *Human Molecular Genetics* 23, R89-R98.
- 428 18. Ahola-Olli, A.V., Wurtz, P., Havulinna, A.S., Aalto, K., Pitkanen, N., Lehtimaki, T., Kahonen, M.,  
429 Lyytikainen, L.P., Raitoharju, E., Seppala, I., et al. (2017). Genome-wide Association Study  
430 Identifies 27 Loci Influencing Concentrations of Circulating Cytokines and Growth Factors.  
431 *American Journal of Human Genetics* 100, 40-50.
- 432 19. Hartwig, F.P., Borges, M.C., Horta, B.L., Bowden, J., and Smith, G.D. (2017). Inflammatory  
433 Biomarkers and Risk of Schizophrenia A 2-Sample Mendelian Randomization Study. *Jama*  
434 *Psychiatry* 74, 1226-1233.
- 435 20. Sarwar, N., Butterworth, A.S., Freitag, D.F., Gregson, J., Willeit, P., Gorman, D.N., Gao, P., Saleheen,  
436 D., Rendon, A., Nelson, C.P., et al. (2012). Interleukin-6 receptor pathways in coronary heart  
437 disease: a collaborative meta-analysis of 82 studies. *Lancet* 379, 1205-1213.
- 438 21. Dehghan, A., Dupuis, J., Barbalic, M., Bis, J.C., Eiriksdottir, G., Lu, C., Pellikka, N., Wallaschofski, H.,  
439 Kettunen, J., Henneman, P., et al. (2011). Meta-Analysis of Genome-Wide Association Studies  
440 in > 80 000 Subjects Identifies Multiple Loci for C-Reactive Protein Levels. *Circulation* 123, 731-  
441 U151.
- 442 22. Wensley, F., Gao, P., Burgess, S., Kaptoge, S., Di Angelantonio, E., Shah, T., Engert, J.C., Clarke, R.,  
443 Davey-Smith, G., Nordestgaard, B.G., et al. (2011). Association between C reactive protein and  
444 coronary heart disease: mendelian randomisation analysis based on individual participant  
445 data. *British Medical Journal* 342.
- 446 23. Matteini, A.M., Li, J., Lange, E.M., Tanaka, T., Lange, L.A., Tracy, R.P., Wang, Y., Biggs, M.L., Arking,  
447 D.E., Fallin, M.D., et al. (2014). Novel gene variants predict serum levels of the cytokines IL-18  
448 and IL-1ra in older adults. *Cytokine* 65, 10-16.
- 449 24. Giambartolomei, C., Zhenli Liu, J., Zhang, W., Hauberg, M., Shi, H., Boocock, J., Pickrell, J., Jaffe,  
450 A.E., The CommonMind, C., Pasaniuc, B., et al. (2018). A Bayesian framework for multiple trait  
451 colocalization from summary association statistics. *Bioinformatics* 34, 2538-2545.
- 452 25. Folkersen, L., Fauman, E., Sabater-Lleal, M., Strawbridge, R.J., Franberg, M., Sennblad, B.,  
453 Baldassarre, D., Veglia, F., Humphries, S.E., Rauramaa, R., et al. (2017). Mapping of 79 loci for  
454 83 plasma protein biomarkers in cardiovascular disease. *Plos Genetics* 13.
- 455 26. Hemani, G., Zhengn, J., Elsworth, B., Wade, K.H., Haberland, V., Baird, D., Laurin, C., Burgess, S.,  
456 Bowden, J., Langdon, R., et al. (2018). The MR-Base platform supports systematic causal  
457 inference across the human phenome. *Elife* 7.
- 458 27. Chen, L., Ge, B., Casale, F.P., Vasquez, L., Kwan, T., Garrido-Martin, D., Watt, S., Yan, Y., Kundu, K.,  
459 Ecker, S., et al. (2016). Genetic Drivers of Epigenetic and Transcriptional Variation in Human  
460 Immune Cells. *Cell* 167, 1398-+.
- 461 28. Hemani, G., Tilling, K., and Smith, G.D. (2017). Orienting the causal relationship between  
462 imprecisely measured traits using GWAS summary data. *Plos Genetics* 13.
- 463 29. Lonsdale, J., Thomas, J., Salvatore, M., Phillips, R., Lo, E., Shad, S., Hasz, R., Walters, G., Garcia, F.,  
464 Young, N., et al. (2013). The Genotype-Tissue Expression (GTEx) project. *Nature Genetics* 45,  
465 580-585.
- 466 30. R Core Team. (2017). A language and environment for statistical computing. R Foundation for  
467 Statistical Computing, Vienna, Austria. In. (<https://www.R-project.org/>).
- 468 31. Ginestet, C. (2011). ggplot2: Elegant Graphics for Data Analysis. *Journal of the Royal Statistical*  
469 *Society Series a-Statistics in Society* 174, 245-245.
- 470 32. Okada, H., Kuhn, C., Feillet, H., and Bach, J.F. (2010). The 'hygiene hypothesis' for autoimmune and  
471 allergic diseases: an update. *Clinical and Experimental Immunology* 160, 1-9.
- 472 33. Chatenoud, L. (2015). Biotherapies targeting T and B cells: from immune suppression to immune  
473 tolerance. *Current Opinion in Pharmacology* 23, 92-97.

- 474 34. Li, P., Zheng, Y., and Chen, X. (2017). Drugs for Autoimmune Inflammatory Diseases: From Small  
475 Molecule Compounds to Anti-TNF Biologics. *Frontiers in Pharmacology* 8.
- 476 35. Theofilopoulos, A.N., Kono, D.H., and Baccala, R. (2017). The multiple pathways to autoimmunity.  
477 *Nature Immunology* 18, 716-724.
- 478 36. Liu, X.B., Fang, L., Guo, T.B., Mei, H.K., and Zhang, J.W.Z. (2013). Drug targets in the cytokine  
479 universe for autoimmune disease. *Trends in Immunology* 34, 120-128.
- 480 37. Zheng, J., Baird, D., Borges, C.M., Bowden, J., Hemani, G., Haycock, P., Evans, D.M., and Davey  
481 Smith, G. (2017). Recent Developments in Mendelian Randomization Studies. In. (*Current*  
482 *Epidemiology Reports*), pp 330-345.
- 483 38. Hartmann, F.J., Khademi, M., Aram, J., Ammann, S., Kockum, I., Constantinescu, C., Gran, B., Piehl,  
484 F., Olsson, T., Codarri, L., et al. (2014). Multiple sclerosis-associated IL2RA polymorphism  
485 controls GM-CSF production in human T-H cells. *Nature Communications* 5.
- 486 39. Chataway, J., Martin, K., Barrell, K., Sharrack, B., Stolt, P., Wraith, D.C., and Grp, A.-M.S. (2018).  
487 Effects of ATX-MS-1467 immunotherapy over 16 weeks in relapsing multiple sclerosis.  
488 *Neurology* 90, E955-504.
- 489 40. MS Society. (2018). Daclizumab. In. ([https://www.msociety.org.uk/about-ms/treatments-and-](https://www.msociety.org.uk/about-ms/treatments-and-therapies/disease-modifying-therapies/daclizumab)  
490 [therapies/disease-modifying-therapies/daclizumab](https://www.msociety.org.uk/about-ms/treatments-and-therapies/disease-modifying-therapies/daclizumab)).
- 491 41. Baecher-Allan, C., Kaskow, B.J., and Weiner, H.L. (2018). Multiple Sclerosis: Mechanisms and  
492 Immunotherapy. *Neuron* 97, 742-768.
- 493 42. Sun, B.B., Maranville, J.C., Peters, J.E., Stacey, D., Staley, J.R., Blackshaw, J., Burgess, S., Jiang, T.,  
494 Paige, E., Surendran, P., et al. (2018). Genomic atlas of the human plasma proteome. *Nature*  
495 558, 73-+.
- 496 43. Kaplanski, G. (2018). Interleukin-18: Biological properties and role in disease pathogenesis.  
497 *Immunological Reviews* 281, 138-153.
- 498 44. Pizarro, T.T., Michie, M.H., Bentz, M., Woraratanadharm, J., Smith, M.F., Foley, E., Moskaluk, C.A.,  
499 Bickston, S.J., and Cominelli, F. (1999). IL-18, a novel immunoregulatory cytokine, is up-  
500 regulated in Crohn's disease: Expression and localization in intestinal mucosal cells. *Journal of*  
501 *Immunology* 162, 6829-6835.
- 502 45. Nowarski, R., Jackson, R., Gagliani, N., de Zoete, M.R., Palm, N.W., Bailis, W., Low, J.S., Harman,  
503 C.C.D., Graham, M., Elinav, E., et al. (2015). Epithelial IL-18 Equilibrium Controls Barrier  
504 Function in Colitis. *Cell* 163, 1444-1456.
- 505 46. Magyari, L., Kovessi, E., Sarlos, P., Javorhazy, A., Sumegi, K., and Melegh, B. (2014). Interleukin and  
506 interleukin receptor gene polymorphisms in inflammatory bowel diseases susceptibility.  
507 *World Journal of Gastroenterology* 20, 3208-3222.
- 508 47. Kanai, T., Kamada, N., and Hisamatsu, T. (2013). Clinical Strategies for the Blockade of IL-18 in  
509 Inflammatory Bowel Diseases. *Current Drug Targets* 14, 1392-1399.
- 510 48. Rincon, M. (2012). Interleukin-6: from an inflammatory marker to a target for inflammatory  
511 diseases. *Trends in Immunology* 33, 571-577.
- 512 49. Hodge, D.R., Hurt, E.M., and Farrar, W.L. (2005). The role of IL-6 and STAT3 in inflammation and  
513 cancer. *European Journal of Cancer* 41, 2502-2512.
- 514 50. Rose-John, S. (2012). IL-6 Trans-Signaling via the Soluble IL-6 Receptor: Importance for the Pro-  
515 Inflammatory Activities of IL-6. *International Journal of Biological Sciences* 8, 1237-1247.
- 516 51. Esparza-Gordillo, J., Schaarschmidt, H., Liang, L.M., Cookson, W., Bauerfeind, A., Lee-Kirsch, M.A.,  
517 Nemat, K., Henderson, J., Paternoster, L., Harper, J.I., et al. (2013). A functional IL-6 receptor  
518 (IL6R) variant is a risk factor for persistent atopic dermatitis. *Journal of Allergy and Clinical*  
519 *Immunology* 132, 371-377.
- 520 52. Briso, E.M., Dienz, O., and Rincon, M. (2008). Cutting edge: Soluble IL-6R is produced by IL-6R  
521 ectodomain shedding in activated CD4 T cells. *Journal of Immunology* 180, 7102-7106.
- 522 53. Jones, G.W., McLoughlin, R.M., Hammond, V.J., Parker, C.R., Williams, J.D., Malhotra, R., Scheller,  
523 J., Williams, A.S., Rose-John, S., Topley, N., et al. (2010). Loss of CD4(+) T Cell IL-6R Expression

524 during Inflammation Underlines a Role for IL-6 Trans Signaling in the Local Maintenance of  
525 Th17 Cells. *Journal of Immunology* 184, 2130-2139.  
526 54. Krumm, B., Meng, X.Z., Xiang, Y., and Deng, J.P. (2017). Identification of small molecule inhibitors  
527 of Interleukin-18. *Scientific Reports* 7.  
528

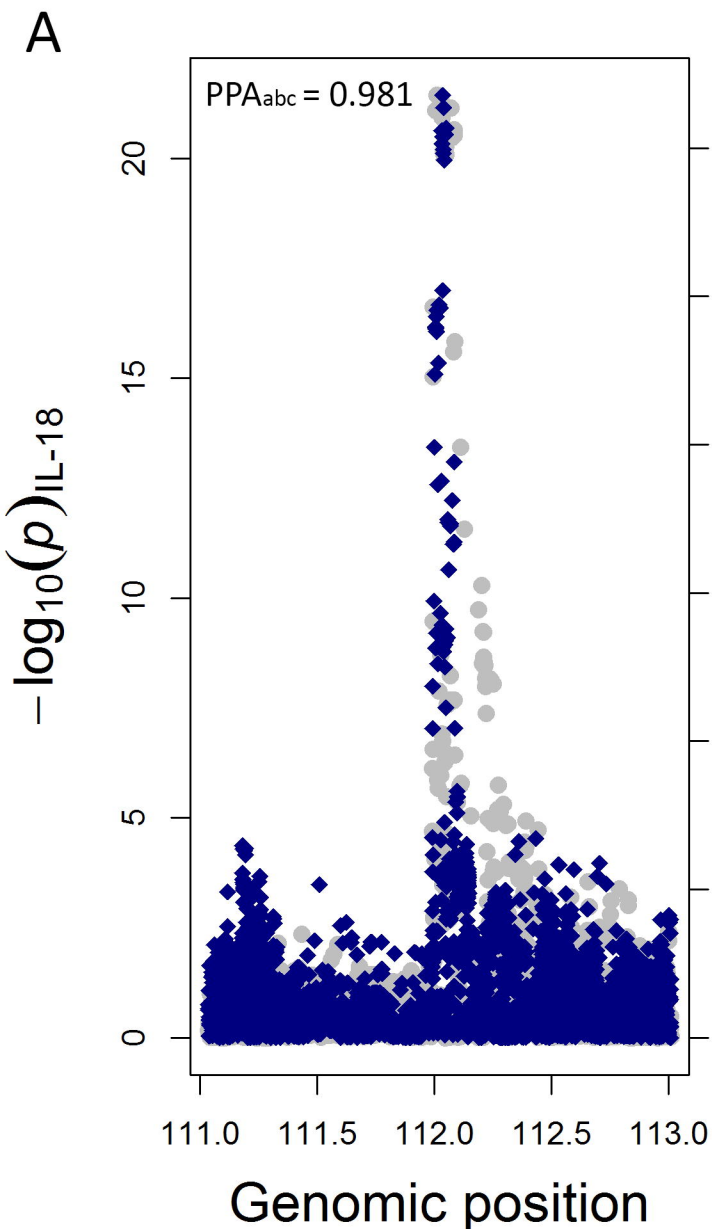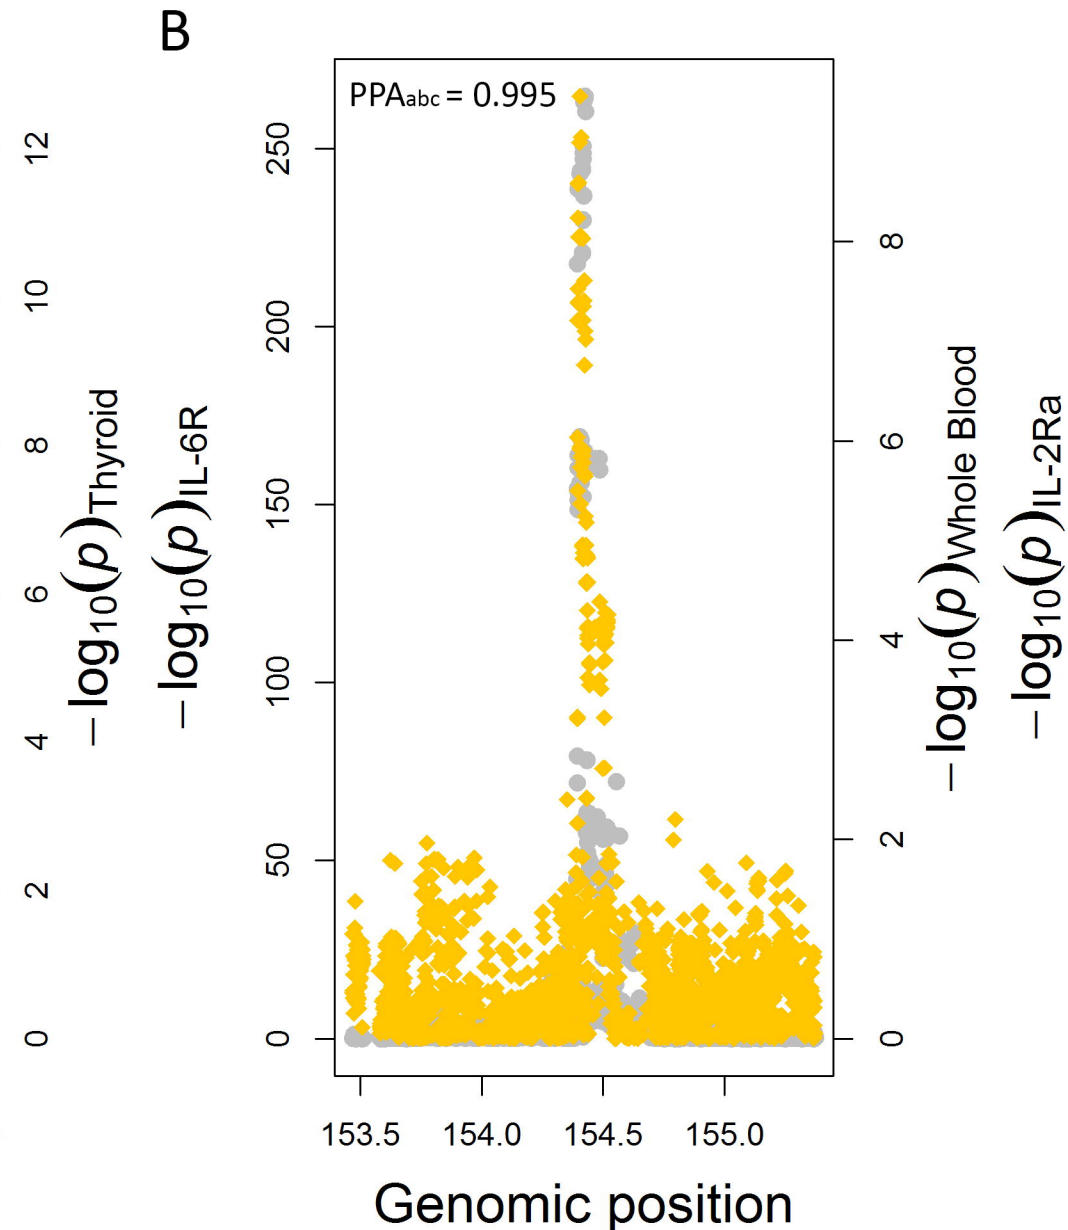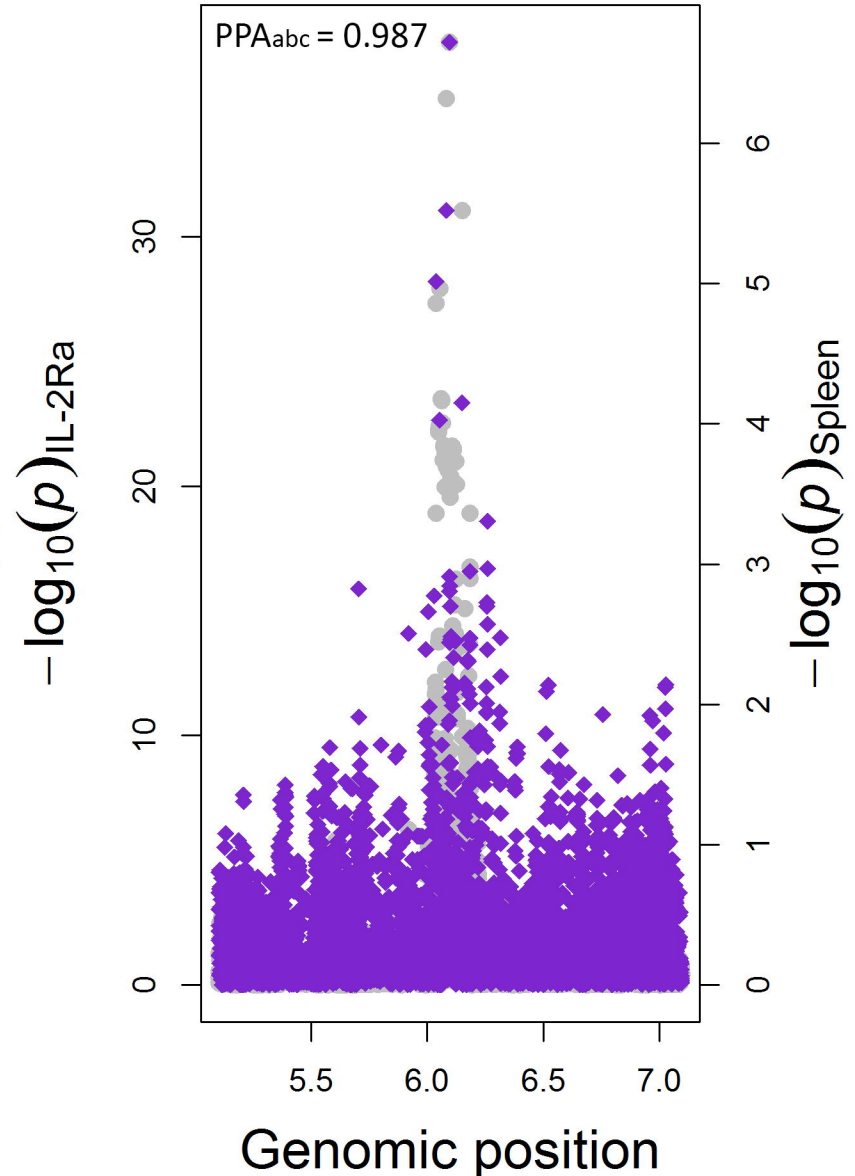

**A****IL-18 & IBD**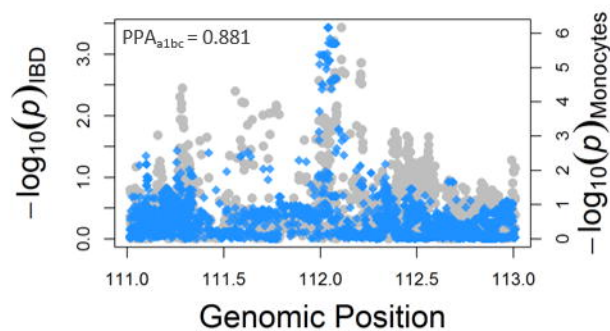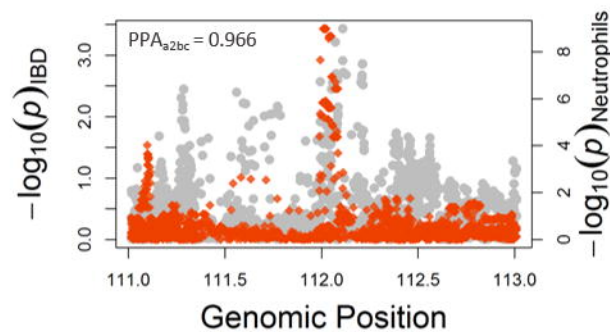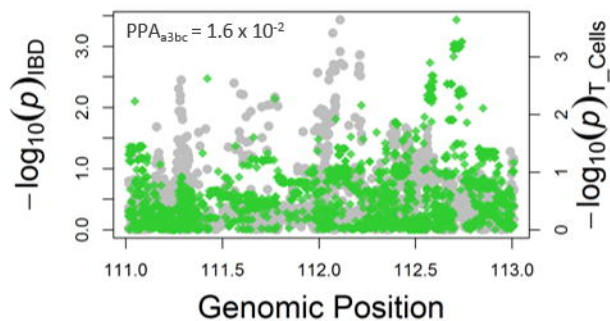**B****IL-6R & Eczema/Dermatitis**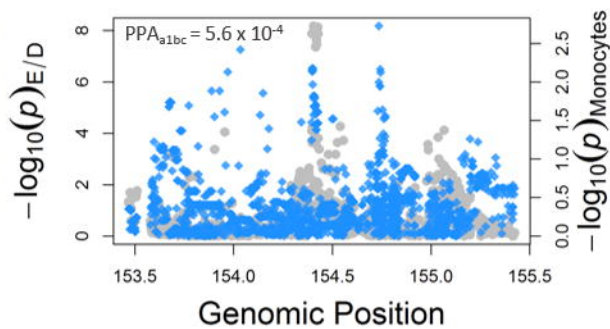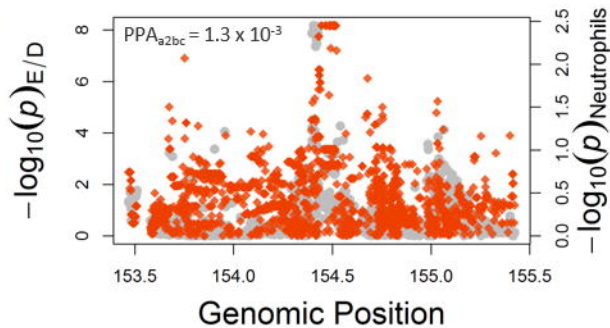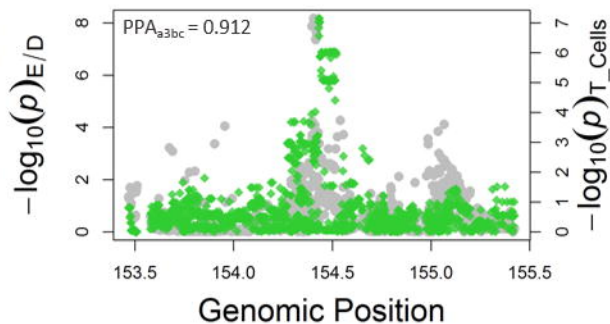

◆ Monocyte eQTL ( $a_1$ )    ◆ Neutrophil eQTL ( $a_2$ )    ◆ T cell eQTL ( $a_3$ )    ● IMD-associated loci ( $b$ )



SNP Left Out

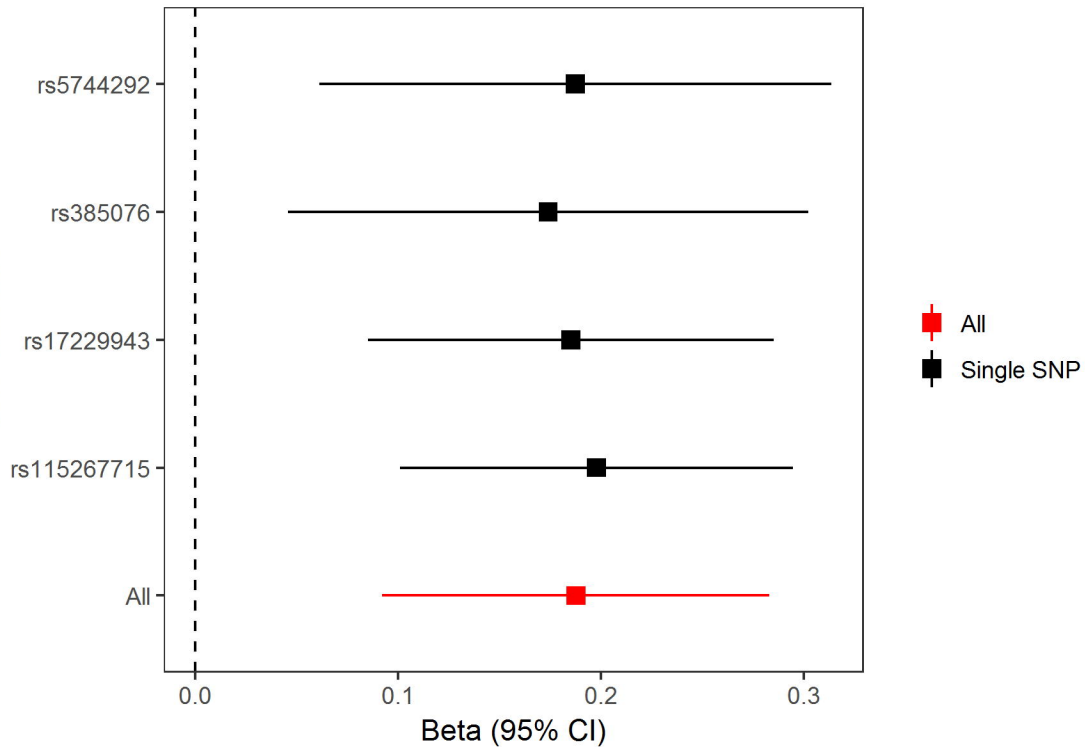

Source: https://www.biorxiv.org/content/10.1101/394296v1.full.pdf
